# Supplementary material
Source: MDPI journal article supplement (https://www.mdpi.com/2673-933X/4/1/5)
Supplement: s1 [file s1]

Archive with 2 entries (2 files):
- Supplementary File S1.xlsx
- Supplementary File S2.pdf
