# Supplementary material
Source: MDPI journal article supplement (https://www.mdpi.com/2673-933X/4/1/5)
Supplement: s1 [file s1 › Supplementary File S1.xlsx]

## Sheet: Dataset Original
															INTAKE						ANIMAL PEFORMENCE (MEAT)
															DMI (kg/d) - control			DMI (kg/d) - Trat			feedlot (Bw -initial) control			feedlot (Bw -initial) tratament			feedlot (Bw -final) control			feedlot (Bw -final) trtament			ADG (kg/d) control			ADG (kg/d) tratament			Feed efficiency (kg/kg) control			Feed efficiency (kg/kg) treat			Carcass weight (kg) control			Carcass weight (kg) tratament
Reference	OBS	Study ID	Country	N-animal	genetic type	Liver abscess score	Liver abscess score	Liver abscess score - STANDARDIZED (Elanco, 2019)	Liver abcesses %	age (animal) month	Experimental design	days exp	concentrate in diet (g/kg DM)	Forage type	Mean	SEM	rep/trat	Mean	SEM	rep/trat	Mean	SEM	rep/trat	Mean	SEM	rep/trat	Mean	SEM	rep/trat	Mean	SEM	rep/trat	Mean	SEM	rep/trat	Mean	SEM	rep/trat	Mean	SEM	rep/trat	Mean	SEM	rep/trat	Mean	SEM	rep/trat	Mean	SEM
Brink et al., 1990 Journal of Animal Science 68:1201-1207	1	1	EUA				abscesees scar (A-)	A							8	0.07	131	8.26	0.18	18	296			307			473	2.3	131	483	5.8	18	1.34	0.02	131	1.42	0.04	18	0.169	0.001	131	0.174	0.004	18	292	1.6	131	298	3.9
	2						abscesses (A)	A							8	0.07	131	8	0.19	15	296			308			473	2.3	131	472	6.1	15	1.34	0.02	131	1.34	0.04	15	0.169	0.001	131	0.168	0.004	15	292	1.6	131	289	4.1
	3						active abscess (A+)	A+							8	0.07	131	7.94	0.24	9	296			299			473	2.3	131	477	7.9	9	1.34	0.02	131	1.37	0.06	9	0.169	0.001	131	0.174	0.005	9	292	1.6	131	292	5.4
	4	2	EUA				abscesees scar (A-)	A							8.5	0.08	139	8.35	0.18	29	317			331			468	2.5	139	476	5.5	29	1.19	0.02	139	1.25	0.04	29	0.142	0.002	139	0.151	0.004	29	289	1.5	139	292	3.2
	5						abscesses (A)	A							8.5	0.08	139	8.33	0.23	17	317			322			468	2.5	139	473	6.9	17	1.19	0.02	139	1.24	0.05	17	0.142	0.002	139	0.148	0.005	17	289	1.5	139	291	4.1
	6						active abscess (A+)	A+							8.5	0.08	139	8.09	0.12	62	317			312			468	2.5	139	460	3.7	62	1.19	0.02	139	1.13	0.03	62	0.142	0.002	139	0.14	0.003	62	289	1.5	139	276	2.2
Brown and Lawrence, 2010 Journal of Animal Science 88:40374043	7	3	EUA	72225		Eli Lilly Liver Check System (Elanco, Greenfield, IN) + Brown et al., 1975	small abscess (A-)	A																																					352.9	3.66	59255	350.8	3.66
	8					Eli Lilly Liver Check System (Elanco, Greenfield, IN) + Brown et al., 1975	large abscesses (A)	A																																					352.9	3.66	59255	351.3	3.66
	9					Eli Lilly Liver Check System (Elanco, Greenfield, IN) + Brown et al., 1975	multiple large abscesses (A+)	A+																																					352.9	3.66	59255	348	3.66
	10					Eli Lilly Liver Check System (Elanco, Greenfield, IN) + Brown et al., 1975	A+AD= liver adhered to part of the gastrointestinal tract or diaphragm or both	A																																					352.9	3.66	59255	339.2	3.66
	11					Eli Lilly Liver Check System (Elanco, Greenfield, IN) + Brown et al., 1975	A+OP = ruptured abscesses	A																																					352.9	3.66	59255	341.9	3.66
Calderon-Cortes and Zinn, 1996 Journal of Animal Science 74:2310-2316	12	4	EUA	32	Mexican Crossbred				12.5		Latin square	80	840	Sudangrass hay	7.28	0.13	32	7	0.13	32	297	1.06	32	297	1.06	32	388	3.89	32	393	3.89	32	1.15	0.03	32	1.2	0.03	32							248	2.46	32	251	2.46
	13				Mexican Crossbred				12.5		Latin square	80	920	Sudangrass hay	6.8	0.13	32	6.94	0.13	32	298	1.06	32	296	1.06	32	411	3.89	32	409	3.89	32	1.41	0.03	32	1.41	0.03	32							262	2.46	32	261	2.46
Depenbusch et al., 2009 Journal of Animal Science 87:2644-2652	14	5	EUA	299	Crossbred				2.4		Randomized complete block		994	Alfalfa hay	9.39	0.27	7	9.34	0.27	7	365	14.7	7	364	14.7	7	543	12	7	543	12	7	1.41	0.05	7	1.42	0.05	7	0.15	0.37	7	0.151	0.37	7	329	7.09	7	333	7.09
	15				Crossbred				2.5		Randomized complete block		1000		9.39	0.27	7	8.66	0.27	7	365	14.7	7	362	14.7	7	543	12	7	522	12	7	1.41	0.05	7	1.25	0.05	7	0.15	0.37	7	0.145	0.37	7	329	7.09	7	317	7.09
	16				Crossbred				4.8		Randomized complete block		994	Alfalfa hay	9.39	0.27	7	9.57	0.27	7	365	14.7	7	364	14.7	7	543	12	7	550	12	7	1.41	0.05	7	1.47	0.05	7	0.15	0.37	7	0.154	0.37	7	329	7.09	7	332	7.09
	17				Crossbred				7.2		Randomized complete block		1000		9.39	0.27	7	8.71	0.27	7	365	14.7	7	364	14.7	7	543	12	7	533	12	7	1.41	0.05	7	1.33	0.05	7	0.15	0.37	7	0.152	0.37	7	329	7.09	7	327	7.09
	18				Crossbred				2.4		Randomized complete block		994	Alfalfa hay	9.39	0.27	7	9.48	0.27	7	365	14.7	7	359	14.7	7	543	12	7	542	12	7	1.41	0.05	7	1.44	0.05	7	0.15	0.37	7	0.152	0.37	7	329	7.09	7	331	7.09
	19				Crossbred				2.4		Randomized complete block		994	Alfalfa hay	9.39	0.27	7	9.21	0.27	7	365	14.7	7	363	14.7	7	543	12	7	538	12	7	1.41	0.05	7	1.38	0.05	7	0.15	0.37	7	0.151	0.37	7	329	7.09	7	330	7.09
Huck et al., 1998 Journal of animal science 76:2984-2990	20	6	EUA	306	Charolais-crossbred steers	0=no liver abscess; 1 = one small abscess; 2 = two small abscesses or one moderate abscess; and 3 = several abscesses, one large abscess, or liver adhered to the body wall	One small abscesses	A			Randomized complete block		900	Corn silage	10.6	0.14	18	10.4	0.14	18	344	4	18	348	4	18	621	5.2	18	598	5.2	18	2	0.05	18	1.82	0.05	18	0.19	0.004	18	0.175	0.004	18	385	3.2	18	371	3.2
	21				Charolais-crossbred steers		One small abscesses	A			Randomized complete block		900	Corn silage	10.6	0.14	18	10	0.14	18	344	4	18	353	4	18	621	5.2	18	599	5.2	18	2	0.05	18	1.8	0.05	18	0.19	0.004	18	0.181	0.004	18	385	3.2	18	371	3.2
	22				Charolais-crossbred steers		One small abscesses	A			Randomized complete block		900	Corn silage	10.6	0.14	18	10.3	0.14	18	344	4	18	351	4	18	621	5.2	18	620	5.2	18	2	0.05	18	1.96	0.05	18	0.19	0.004	18	0.19	0.004	18	385	3.2	18	384	3.2
	23				Charolais-crossbred steers		One small abscesses	A			Randomized complete block		900	Corn silage	10.6	0.14	18	10.4	0.14	18	344	4	18	353	4	18	621	5.2	18	619	5.2	18	2	0.05	18	1.91	0.05	18	0.19	0.004	18	0.184	0.004	18	385	3.2	18	383	3.2
	24				Charolais-crossbred steers		One small abscesses	A			Randomized complete block		900	Corn silage	10.3	0.14	18	10.4	0.14	18	341	4	18	348	4	18	613	5.2	18	598	5.2	18	1.99	0.05	18	1.82	0.05	18	0.192	0.004	18	0.175	0.004	18	380	3.2	18	371	3.2
	25				Charolais-crossbred steers		One small abscesses	A			Randomized complete block		900	Corn silage	10.3	0.14	18	10	0.14	18	341	4	18	353	4	18	613	5.2	18	599	5.2	18	1.99	0.05	18	1.8	0.05	18	0.192	0.004	18	0.181	0.004	18	380	3.2	18	371	3.2
	26				Charolais-crossbred steers		One small abscesses	A			Randomized complete block		900	Corn silage	10.3	0.14	18	10.3	0.14	18	341	4	18	351	4	18	613	5.2	18	620	5.2	18	1.99	0.05	18	1.96	0.05	18	0.192	0.004	18	0.19	0.004	18	380	3.2	18	384	3.2
	27				Charolais-crossbred steers		One small abscesses	A			Randomized complete block		900	Corn silage	10.3	0.14	18	10.4	0.14	18	341	4	18	353	4	18	613	5.2	18	619	5.2	18	1.99	0.05	18	1.91	0.05	18	0.192	0.004	18	0.184	0.004	18	380	3.2	18	383	3.2
Jorgensen et al., 2007 Animal 1:6 797-803	28	7	Denmark	48	Danish Friesian Bull	Brink et al 1990			9.09			210			6.87	0.13	22	6.76	0.13	21							431	52	22	446	52	21	1.364	3.21	22	1.441	3.21	21							233.4	4.2	22	236.8	4.2
	29				Danish Friesian Bull	Brink et al 1990			20			210			6.87	0.13	22	6.1	0.13	20							431	52	22	433	52	20	1.364	3.21	22	1.417	3.21	20							233.4	4.2	22	234.2	4.2
	30				Danish Friesian Bull	Brink et al 1990			22.72			210			6.87	0.13	22	6.56	0.13	22							431	52	22	450	52	22	1.364	3.21	22	1.444	3.21	22							233.4	4.2	22	243.8	4.2
May et al., 2010 Journal of Animal Science 88:2433-2443	31	8	EUA	243	Crossbred				3.1		Randomized complete block		994	Alfalfa hay	9.71	0.211	8	9.8	0.211	8	393	1.4	8	391	1.4	8	600	6.9	8	609	6.9	8	1.48	0.05	8	1.54	0.05	8	0.153	0.0029	8	0.157	0.0029	8	389	4.2	8	399	4.2
	32				Crossbred				9.4		Randomized complete block		994	Alfalfa hay	9.71	0.211	8	9.2	0.211	8	393	1.4	8	393	1.4	8	600	6.9	8	600	6.9	8	1.48	0.05	8	1.47	0.05	8	0.153	0.0029	8	0.16	0.0029	8	389	4.2	8	391	4.2
	33				Crossbred				3.1		Randomized complete block		994	Alfalfa hay	9.71	0.211	8	9.34	0.211	8	393	1.4	8	391	1.4	8	600	6.9	8	588	6.9	8	1.48	0.05	8	1.42	0.05	8	0.153	0.0029	8	0.152	0.0029	8	389	4.2	8	385	4.2
	34				Crossbred				6.3		Randomized complete block		994	Alfalfa hay	9.71	0.211	8	9.51	0.211	8	393	1.4	8	391	1.4	8	600	6.9	8	587	6.9	8	1.48	0.05	8	1.4	0.05	8	0.153	0.0029	8	0.148	0.0029	8	389	4.2	8	383	4.2
	35				Crossbred				9.4		Randomized complete block		994	Alfalfa hay	9.71	0.211	8	9.3	0.211	8	393	1.4	8	390	1.4	8	600	6.9	8	584	6.9	8	1.48	0.05	8	1.4	0.05	8	0.153	0.0029	8	0.15	0.0029	8	389	4.2	8	375	4.2
	36				Crossbred				3.1		Randomized complete block		994	Alfalfa hay	9.71	0.211	8	9.8	0.211	8	390	1.4	8	391	1.4	8	594	6.9	8	609	6.9	8	1.44	0.05	8	1.54	0.05	8	0.159	0.0029	8	0.157	0.0029	8	385	4.2	8	399	4.2
	37				Crossbred				9.4		Randomized complete block		994	Alfalfa hay	9.06	0.211	8	9.2	0.211	8	390	1.4	8	393	1.4	8	594	6.9	8	600	6.9	8	1.44	0.05	8	1.47	0.05	8	0.159	0.0029	8	0.16	0.0029	8	385	4.2	8	391	4.2
	38				Crossbred				3.1		Randomized complete block		994	Alfalfa hay	9.06	0.211	8	9.34	0.211	8	390	1.4	8	391	1.4	8	594	6.9	8	588	6.9	8	1.44	0.05	8	1.42	0.05	8	0.159	0.0029	8	0.152	0.0029	8	385	4.2	8	385	4.2
	39				Crossbred				6.3		Randomized complete block		994	Alfalfa hay	9.06	0.211	8	9.51	0.211	8	390	1.4	8	391	1.4	8	594	6.9	8	587	6.9	8	1.44	0.05	8	1.4	0.05	8	0.159	0.0029	8	0.148	0.0029	8	385	4.2	8	383	4.2
	40				Crossbred				9.4		Randomized complete block		994	Alfalfa hay	9.06	0.211	8	9.3	0.211	8	390	1.4	8	390	1.4	8	594	6.9	8	584	6.9	8	1.44	0.05	8	1.4	0.05	8	0.159	0.0029	8	0.15	0.0029	8	385	4.2	8	375	4.2
Mir et al., 2008 Journal of Animal Science 86:3125-3136	41	9	Canada	48	Crossbred	4-point scale (Gibb et al., 2004)			36		Completely randomized	157	860	Barley silage	8.6	0.3	12	10.1	0.4	12	402	8	12	382	7.8	12	572	13.1	12	608	11.1	12	1.1	0.1	12	1.4	0.1	12	0.121	0.0045	12	0.143	0.0043	12	325	8.4	12	347	6.9
Salim et al., 2014 Livestock Science 161: 53-59	42	10	Canada	102	Crossbred	0= no abscess; 1- one or two small(less tha 2.5 cm in diameter) abscesses; 2-two to four active abscesses under 2.5 cm in diameter or one larger (42.5 cm in diameter); 3- more than 5 active small abscesses ormorethanonelargeactiveabscess or abscessscars	one or two small (less than 2.5 cm in diameter) abscesses or abscessscars	A			Completely randomized		900	Haylage	10.7	0.4	12	11.7	0.4	15	349	19.1	12	373	19.1	15	594	25.9	12	615	25.9	15	1.97	0.103	12	2.09	0.103	15	0.186	0.009	12	0.179	0.009	15	353	18.1	12	357	18.1
	43				Crossbred		one or two small (less than 2.5 cm in diameter) abscesses or abscessscars	A			Completely randomized		900	Haylage	10.7	0.4	12	11.6	0.4	12	349	19.1	12	383	19.1	12	594	25.9	12	618	25.9	12	1.97	0.103	12	1.93	0.103	12	0.186	0.009	12	0.168	0.009	12	353	18.1	12	359	18.1
	44				Crossbred		one or two small (less than 2.5 cm in diameter) abscesses or abscessscars	A			Completely randomized		900	Haylage	10.7	0.4	12	11.3	0.4	12	349	19.1	12	375	19.1	12	594	25.9	12	645	25.9	12	1.97	0.103	12	2.01	0.103	12	0.186	0.009	12	0.179	0.009	12	353	18.1	12	381	18.1
	45				Crossbred		one or two small (less than 2.5 cm in diameter) abscesses or abscessscars	A			Completely randomized		900	Haylage	10.7	0.4	12	11.4	0.4	12	349	19.1	12	371	19.1	12	594	25.9	12	693	25.9	12	1.97	0.103	12	2.1	0.103	12	0.186	0.009	12	0.185	0.009	12	353	18.1	12	344	18.1
	46				Crossbred		one or two small (less than 2.5 cm in diameter) abscesses or abscessscars	A			Completely randomized		900	Haylage	10.7	0.4	12	12.3	0.4	12	349	19.1	12	359	19.1	12	594	25.9	12	609	25.9	12	1.97	0.103	12	2.01	0.103	12	0.186	0.009	12	0.158	0.009	12	353	18.1	12	358	18.1
	47				Crossbred		one or two small (less than 2.5 cm in diameter) abscesses or abscessscars	A			Completely randomized		900	Haylage	10.7	0.4	12	11.1	0.4	12	349	19.1	12	367	19.1	12	594	25.9	12	606	25.9	12	1.97	0.103	12	1.94	0.103	12	0.186	0.009	12	0.177	0.009	12	353	18.1	12	356	18.1
[truncated: 37 more columns]

## Sheet: Plan1
branco = leticia
vermelho = andrea
verde = Suziane
daiane=Amarelo
Azul = rodrigo
roxo= joão
verde estranho= henrique
bege= Mari
